# Supplementary material for: Targeted proteoform mapping uncovers specific Neurexin-3 variants required for dendritic inhibition
Source: PubMed Central journal article supplement (PMC9275415; doi:10.1016/j.neuron.2022.04.017), 2022-07-06
Supplement: mmc1.pdf [file mmc1.pdf]

**Neuron, Volume 110**

**Supplemental information**

**Targeted proteoform mapping uncovers specific**

**Neurexin-3 variants required**

**for dendritic inhibition**

**David Hauser, Katharina Behr, Kohtarou Konno, Dietmar Schreiner, Alexander Schmidt, Masahiko Watanabe, Josef Bischofberger, and Peter Scheiffele**

Figure S1

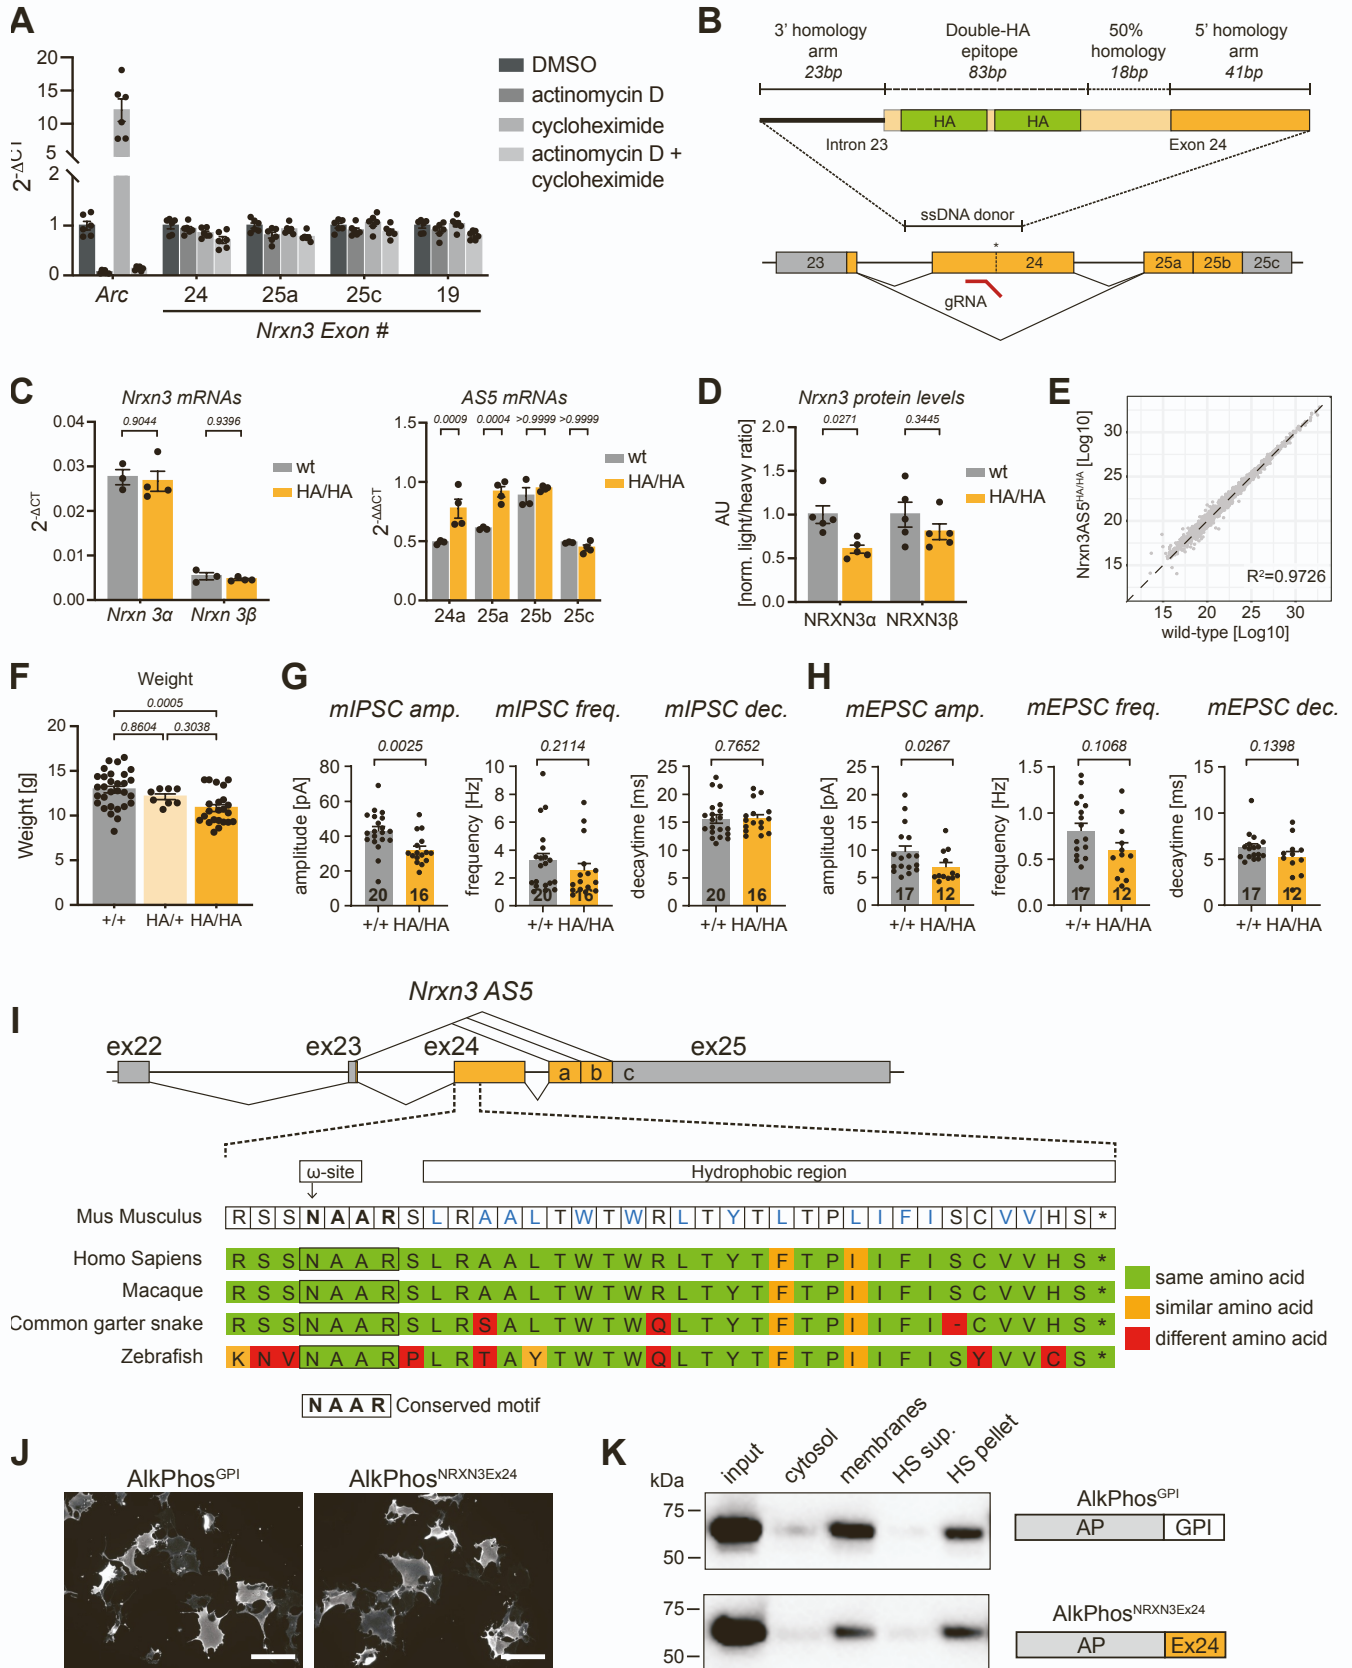

**Figure S1. Validation of GPI-anchored Neurexin 3 expression (addition to Figure 1)**

(A) Quantitative RT-PCR analysis of mRNAs from cortical cultures treated with actinomycin D (10µg/ml), cycloheximide (25µg/ml) or both and DMSO only control, normalized to *Gapdh*, N=2 cortical culture preparations, n=3 culture well replicates per preparation, DIV12, *Arc* = Activity-regulated cytoskeleton-associated protein.

(B) Schematic of HA epitope-tag insertion into exon 24 of *Nrxn3*. AS5 with alternative donor- and acceptor splice sites or alternative exon (yellow) and constitutive exon (grey) indicated below with position of gRNA recognition site indicated, single stranded DNA donor and homology regions indicated on top, with homology arms and insert labeled.

(C) Quantitative PCR analysis of hippocampal RNA from *wild-type* and homozygous *Nrxn3AS5<sup>HA/HA</sup>* knock-in mice, for both major *Nrxn3* (left panel, normalized to *Gapdh*) and AS5 splice isoforms mRNAs (right panel, normalized to *Gapdh* and *PAN-Nrxn3*), N=3-4 mice per genotype.

(D) Protein level assessment of *wild-type* and homozygous *Nrxn3AS5<sup>HA/HA</sup>* knock-in mice by targeted proteomics. Ratios of light to heavy peptide detection are displayed in reference to *wild-type* samples as average values for 2 heavy peptides. Note that NRXN3 beta expression in the hippocampus is very low resulting in higher variability of measurements. The reduction in NRXN3 protein output is likely due to translational silencing through RNA elements characterized in Figure 5. Hippocampus, P25-30, N=5 mice per genotype.

(E) Shotgun proteomics displayed as relative MS abundance comparing overall proteome of *wild-type* and homozygous *Nrxn3AS5<sup>HA/HA</sup>* knock-in mice. Hippocampus, P25-30, N=5 mice per genotype.

(F) Weight of *wild-type* and heterozygous or homozygous *Nrxn3AS5<sup>HA</sup>* littermates, P25-30, N=8-30 mice.

(G) Amplitude, frequency and decay time constants of miniature inhibitory currents of *wild-type* and homozygous *Nrxn3AS5<sup>HA</sup>* mice, P42-56, N=3 mice per genotype.

(H) Amplitude, frequency and decay time constants of miniature excitatory currents of *wild-type* and homozygous *Nrxn3AS5<sup>HA</sup>* mice, P42-56, N=3 mice per genotype.

(I) Schematic representation of AS5 of *Nrxn3* and evolutionary conservation between species of the coding region of exon 24. Identical amino acids are highlighted green, amino acids with

similar side chains in orange, divergent amino acids in red, large hydrophobic amino acids in the mouse sequence are marked in blue.

(J) Immunostainings of COS7-cells with overexpressed HA-tagged alkaline phosphatase constructs with endogenous GPI-anchoring sequence (left) or fused in frame to the exon 24 coding sequence of *Nrxn3* (right).

(K) Western Blot of subcellular fractionation of cytosolic, membrane, and high-salt (HS) washed membrane fractions (equal percentage of total sample loaded in all lanes) from transfected HEK293 cells expressing HA-tagged alkaline phosphatase constructs.

Mean and SEM, two-way ANOVA followed by Bonferroni's test (C,D, and F) or Mann-Whitney test (G and H), Pearson correlation (E). Scale bar in (J) is 100  $\mu\text{m}$ .

Figure S2

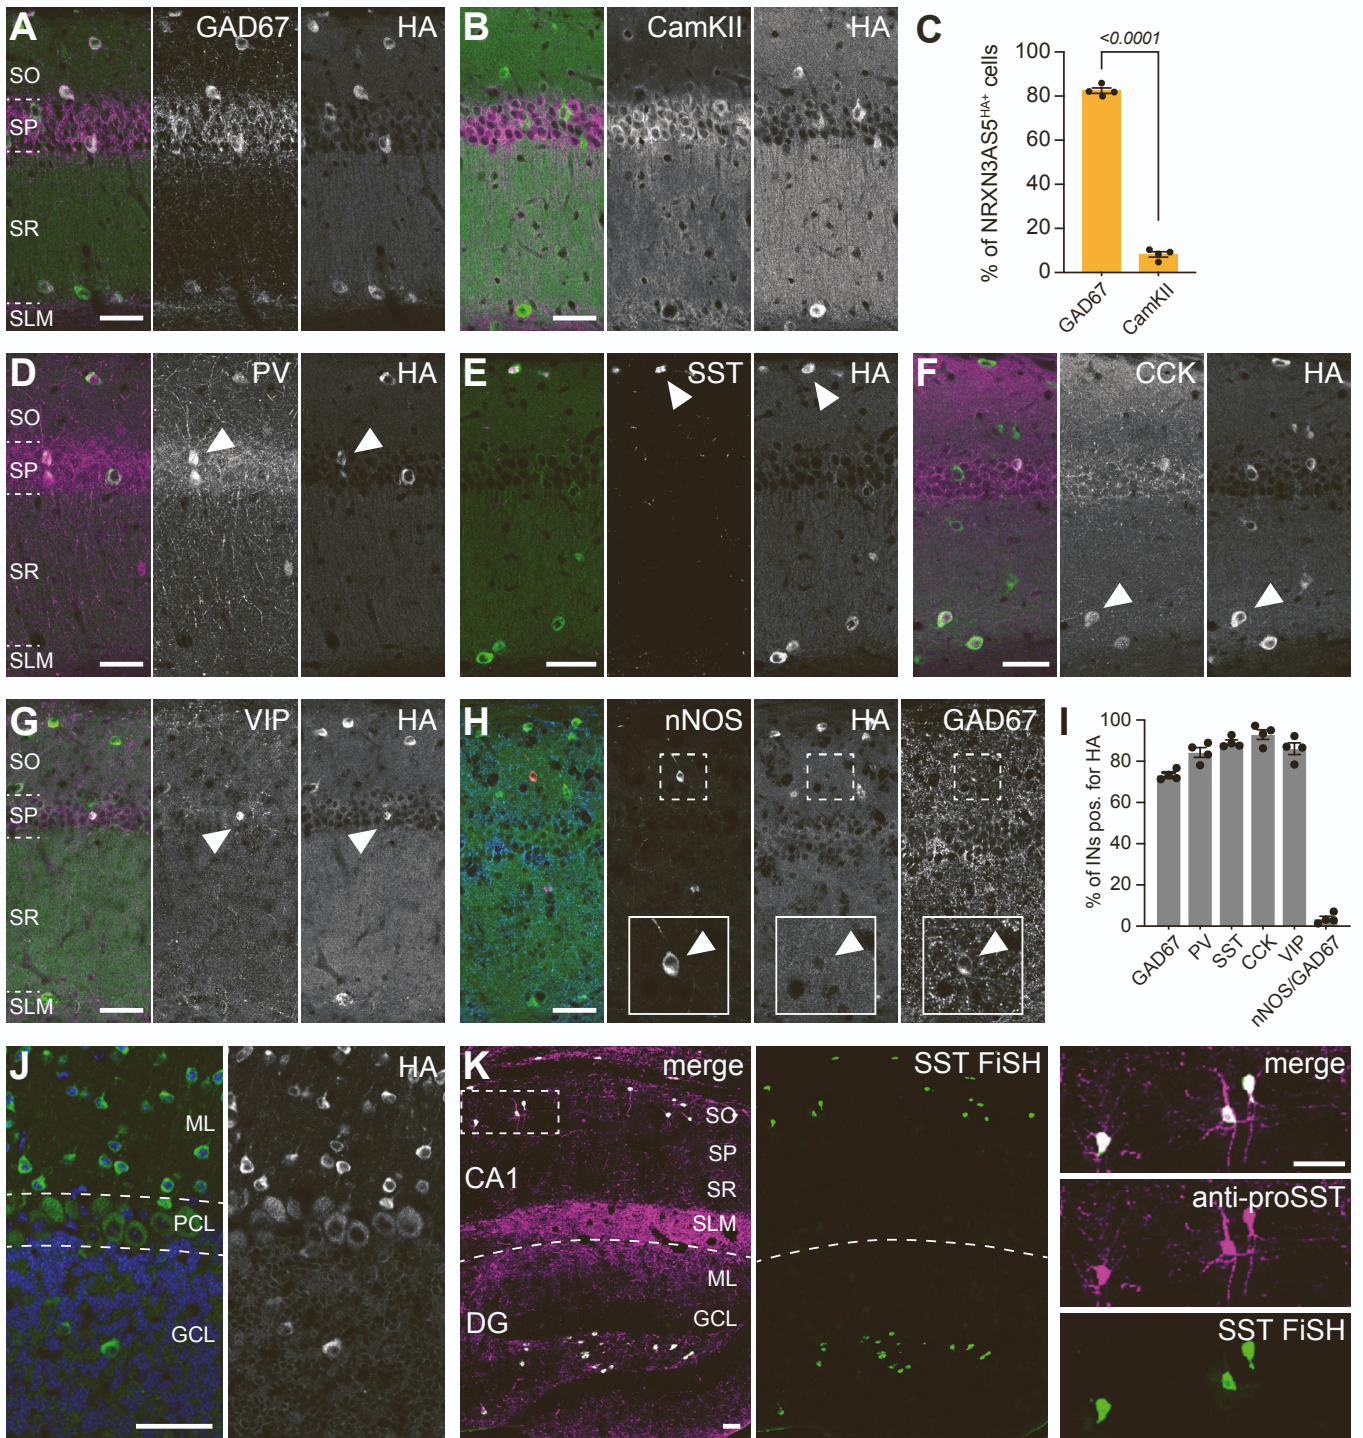



**Figure S2. Selective expression of NRXN3 AS5+ proteoforms (addition to Figure 2)**

(A,B) Co-expression analysis of NRXN3 AS5<sup>HA</sup> protein (HA, green) and GAD67 or CamKII (magenta) in CA1, SO = stratum oriens, SP = stratum pyramidale, SR = stratum radiatum, SLM = stratum lacunosum moleculare.

(C) Fraction of NRXN3 AS5<sup>HA</sup> positive cells co-expressing GAD67 or CamKII, N=4 mice, n=3-4 brain slices per mouse, P25-30.

(D-H) Co-expression analysis of NRXN3 AS5<sup>HA</sup> protein (HA, green) with interneuron markers (magenta) parvalbumin (PV), somatostatin (SST), cholecystokinin (CCK), VIP and nNOS/GAD67 in CA1. Arrowheads show example co-labeled cells. Inset in H shows magnified soma of cell.

(I) Fraction of GABAergic interneurons in CA1 co-expressing NRXN3-AS5<sup>HA</sup>, N=4 mice, n=3-4 brain slices per mouse, P25-30. Note that for nNOS only cells also positive for GAD67 were counted.

(J) Immunochemical detection of HA-tagged proteins in cerebellum from homozygous *Nrxn3-AS5<sup>HA/HA</sup>* knock-in mice (HA, green, DAPI, blue), ML = molecular layer, PCL = purkinje cell layer, GCL = granule cell layer.

(K) Validation of newly generated anti-pro-SST antibody (magenta) showing co-labeling of SST mRNA-expressing cells (detected by fluorescent in situ hybridization, green) in mouse hippocampus.

Mean and SEM, students t-test, scale bar is 50  $\mu$ m.

Figure S3

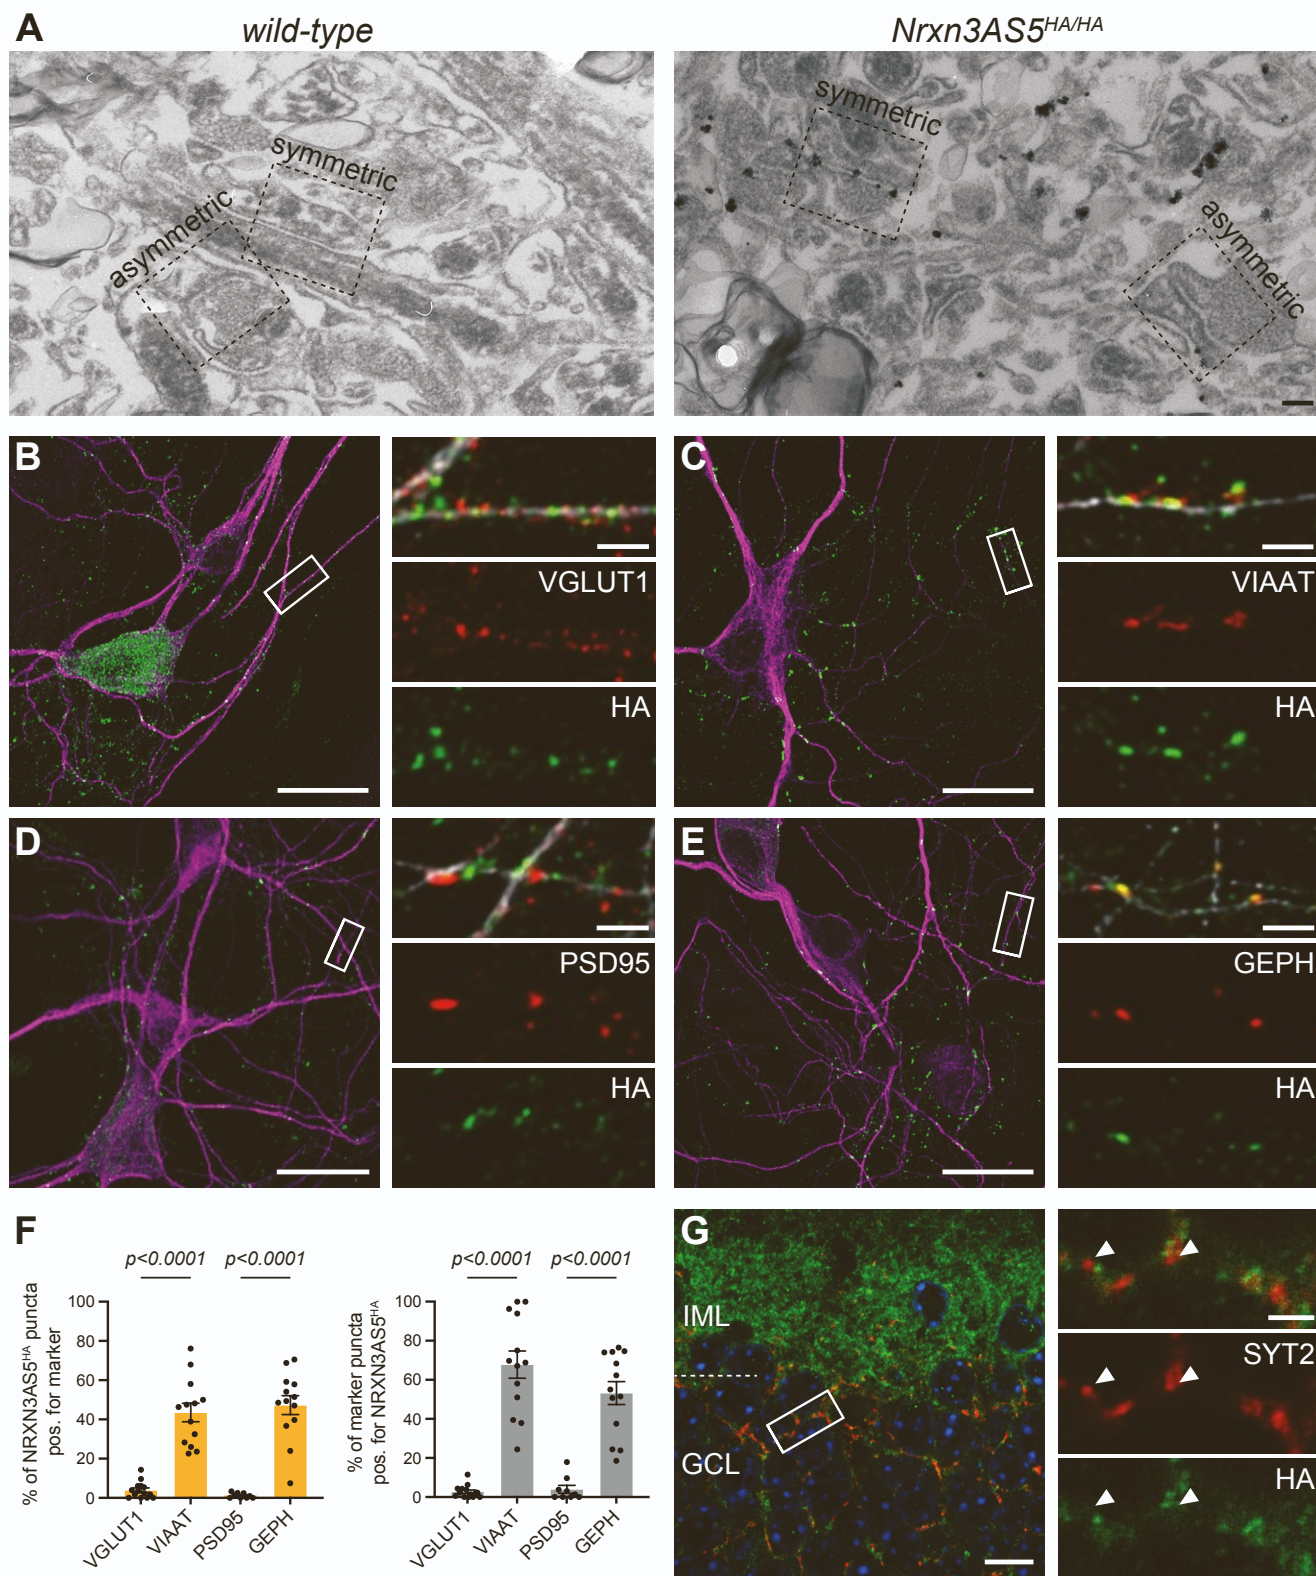

**Figure S3. Synaptic expression of NRXN3 AS5+ proteoforms (addition to Figure 3)**

(A) Overview images of pre-embedding immunoelectron microscopy shown in Figure 2D.

(B-E) Immunocytochemistry of day in vitro 10 hippocampal cultures from *Nrxn3AS5<sup>HA/HA</sup>* knock-in mice with co-labeling of pre-synaptic markers vGlut1 (B) or VIAAT (C) and post-synaptic markers PSD95 (D) or Gephyrin (E) (MAP2, magenta/white, HA, green, pre- and post-synaptic markers, red). Note that the labeled soma in panel B is a GABAergic cell whereas all other somata shown are glutamatergic.

(F) Quantification of synaptic localization displaying the percentage of HA-positive puncta co-labeled with pre- and post-synaptic markers (left) and percentage of respective pre- and post-synaptic markers co-labeled with anti-HA immunostaining (right). Mean and SEM, one-way ANOVA followed by Bonferroni's test, N=2 hippocampal cultures, n=6-8 ROI (one per coverslip) per condition, 60-100 puncta per ROI.

(G) High magnification view of NRXN3-AS5<sup>HA</sup> protein (HA, green) and synaptotagmin 2 (SYT2, red) localization in mouse dentate gyrus (P28), IML = inner molecular layer, GCL = granule cell layer. Arrowheads indicate SYT2 positive puncta negative for HA labeling.

Scale bar is 200 nm in (A), 20  $\mu$ m in (B-E), 10  $\mu$ m in (G) and 2  $\mu$ m in the enlarged regions of interest in (B-E) and (G).



Figure S4

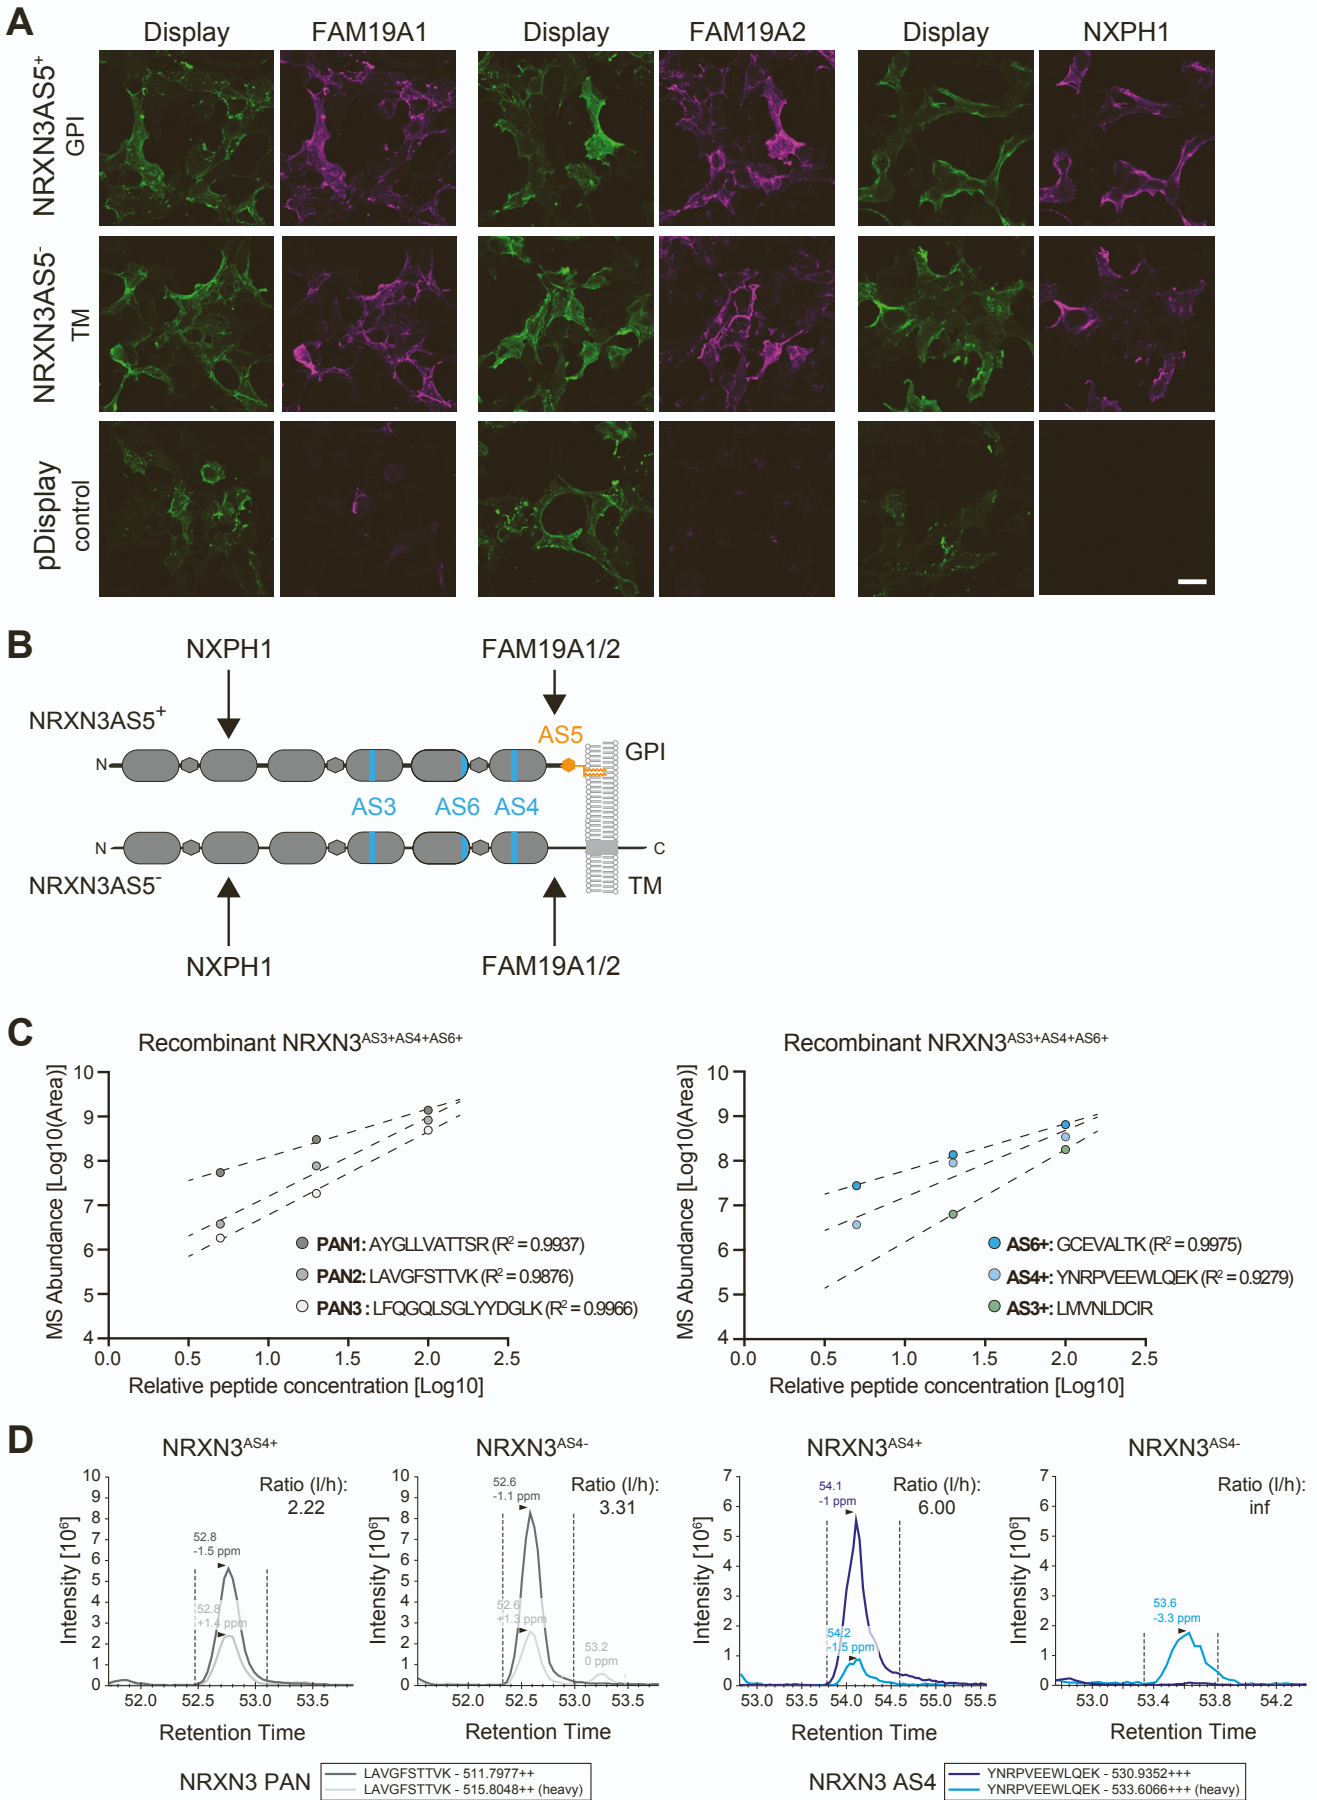

**Figure S4. Binding partner and targeted proteomic assay validation (addition to Figure 4)**

(A) Co-expression and cell surface labeling of HEK293T cells co-transfected with GPI-anchored NRXN3 AS5+, transmembrane NRXN3 AS5-, or pDisplay (driving membrane-bound CFP), together with NXPH1, FAM19A1, and FAM19A2, respectively. Both NRXN3 constructs had the following splice insertions: AS1+, AS2-, AS3+, AS4+, AS6+.

(B) Illustration of position of NXPH1 and FAM19A1/2 interaction sites in the NRXN3AS5+ and AS5- ectodomains.

(C) Assay development for detection of NRXN3 PAN peptides (left) and peptides detecting alternative splice insertions at AS3, AS4, AS6 (right). Titration of increasing amounts of recombinant NRXN3 protein expressed in HEK293 cells. Note that the MS abundance for NRXN3 PAN peptides in anti-HA immunoprecipitates plotted in Figure 3 is 7.5-9.0, i.e. well within the sensitivity range covered by this assay.

(D) Endogenous and heavy reference peptide traces for NRXN3 PAN and NRXN3 AS4 peptides in samples containing recombinant NRXN3 protein with and without splice insertion at AS4.

Scale bar in (A) is 20 $\mu$ m.

Figure S5

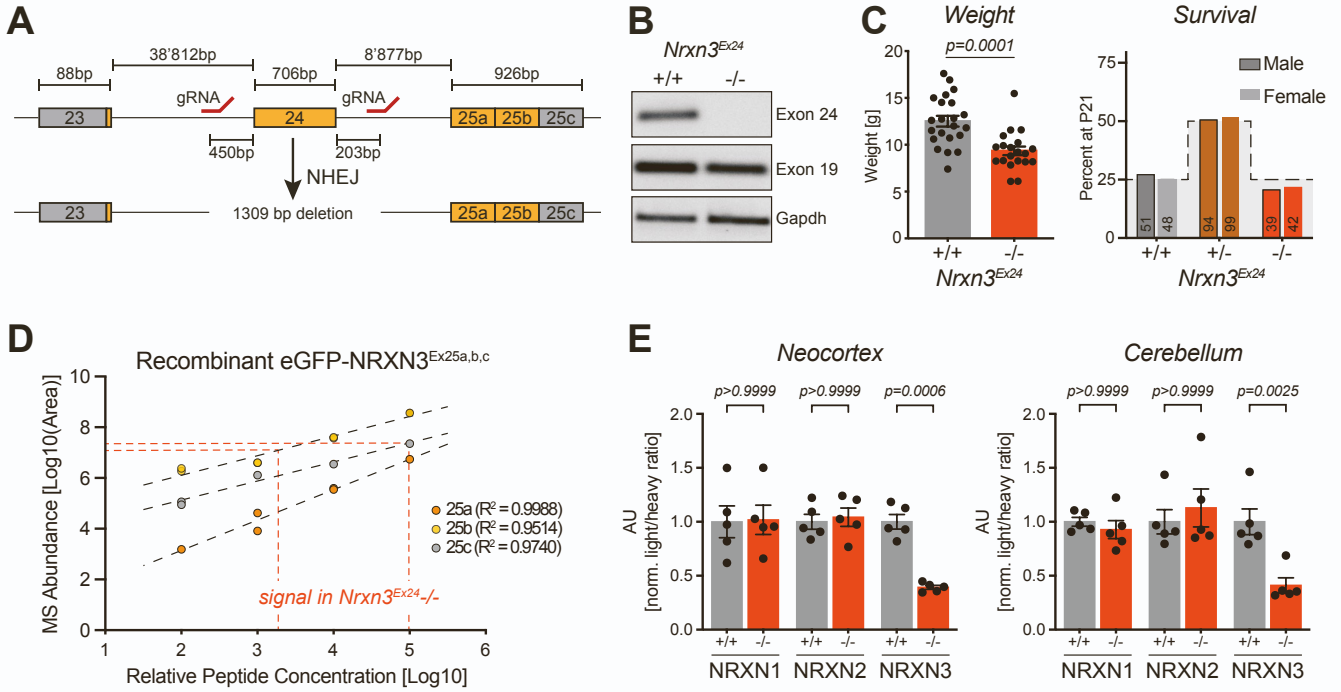

**Figure S5. Properties of *Nrxn3*<sup>ΔEx24</sup> mice (addition to Figure 5)**

(A) Schematic diagram illustrating the generation of *Nrxn3*<sup>ΔEx24</sup> mice by Crispr/Cas9 gene editing with two gRNAs targeting introns upstream and downstream of exon 24. Sizes of exons (boxes) and introns (dashed lines), and position of gRNA recognition sites are indicated. Non-homologous end-joining (NHEJ) resulted in a 1309 bp deletion.

(B) Semi-quantitative PCR amplifying *Nrxn3* transcript regions containing alternative exon 24 or the constitutive exon 19 or *Gapdh* control from mouse hippocampus.

(C) Weight of *wild-type* and *Nrxn3*<sup>ΔEx24</sup> littermates, P25-30, N=20-21 mice (left panel). The cause for the weight reduction is unknown but reduced weight is also reported for global deletion of all NRXN3 isoforms. Survival of *wild-type*, heterozygous and homozygous *Nrxn3*<sup>ΔEx24</sup> mice in relation to expected Mendelian ratios for male and female mice at P21, total animal numbers are indicated within columns (right panel).

(D) Assay development for detection of peptides encoded by alternative acceptor sites 25a and 25b and constitutive exon 25c. Titration of a recombinant protein containing all three alternative segments probed with PRM assays for 25a, 25b and 25c. Signal level of endogenous peptides for 25b and 25c from *Nrxn3*<sup>ΔEx24</sup> hippocampus indicated with dashed lines (average of N=5 mice).

(E) Detection of NRXN1, NRXN2, NRXN3 by targeted proteomics with heavy peptides targeting proteotypic peptides shared by all NRXN1, NRXN2 and NRXN3 proteoforms. Ratios of light to heavy peptide detection are displayed in reference to *wild-type* samples of each peptide individually, one representative peptide shown for cerebellum and cortical samples, consistent results were obtained for multiple proteotypic peptides for the same proteoform (See Table S6), P25-30, N=5 mice per genotype and brain area.

Mean and SEM, student's t-test (C) or two-way ANOVA followed by Bonferroni's test (E).



Figure S6

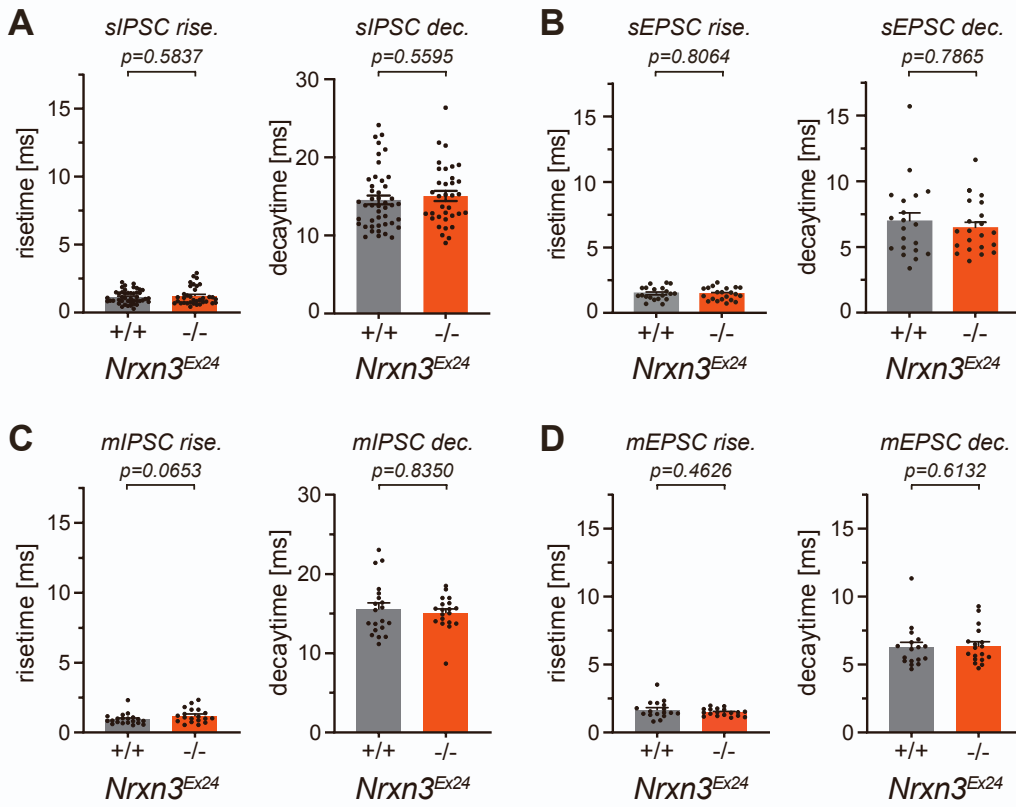

**Figure S6. Kinetics of spontaneous events and miniature postsynaptic currents in *Nrxn3<sup>ΔEx24</sup>* mice (addition to Figure 6)**

(A) Kinetics (rise and decay time) of dentate gyrus granule cell sIPSCs recorded from *wild-type* (N=16 animals, n=45 cells) and homozygous *Nrxn3<sup>ΔEx24</sup>* mice (N=12 animals, n=35 cells).

(B) Kinetics (rise and decay time) of dentate gyrus granule cell sEPSCs recorded from *wild-type* (N=4 animals, n=20 cells) and homozygous *Nrxn3<sup>ΔEx24</sup>* mice (N=4 animals, n=21 cells).

(C) Kinetics (rise and decay time) of dentate gyrus granule cell mIPSCs recorded from *wild-type* (N=3 animals, n=20 cells) and homozygous *Nrxn3<sup>ΔEx24</sup>* mice (N=3 animals, n=19 cells).

(D) Kinetics (rise and decay time) of dentate gyrus granule cell mEPSCs recorded from *wild-type* (N=3 animals, n=17 cells) and homozygous *Nrxn3<sup>ΔEx24</sup>* mice (N=3 animals, n=18 cells).

Mean and SEM, Mann-Whitney test.

Figure S7

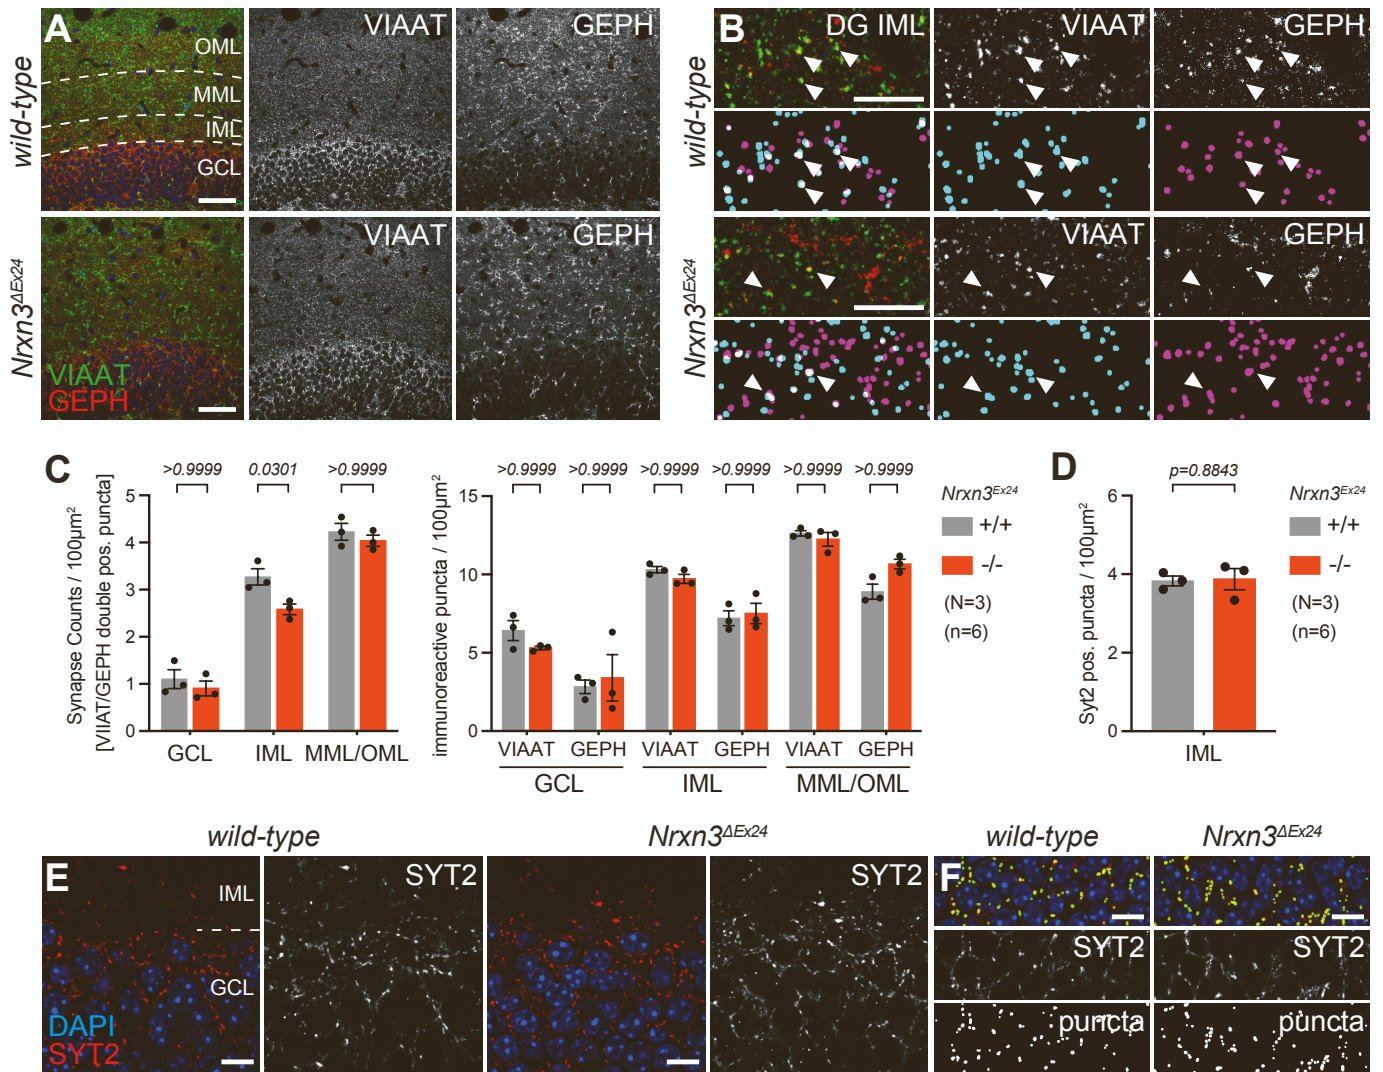

**Figure S7. Synapse number analysis of *Nrxn3*<sup>ΔEx24</sup> mice (addition to Figure 7)**

(A) Immunochemical detection of synaptic markers VIAAT (green) and Gephyrin (red) in dentate gyrus of hippocampus from *wild-type* mice (top panel) and *Nrxn3*<sup>ΔEx24</sup> mice (bottom panel), OML = outer molecular layer, MML = middle molecular layer, IML = inner molecular layer, GCL = granule cell layer.

(B) High magnification view of synaptic markers VIAAT (green) and Gephyrin (red) in dentate gyrus IML from *wild-type* mice (top panels) and *Nrxn3*<sup>ΔEx24</sup> mice (bottom panels). Positive puncta for VIAAT (cyan) and Gephyrin (magenta) are shown as detected by the synapse counter plug-in and example overlapping puncta (white) are indicated by arrowheads.

(C) Quantification of immunoreactive puncta for VIAAT/Gephyrin double-positive structures (left panel) and for pre- (VIAAT) and post-synaptic (Gephyrin) markers (right panel) in granule cell (GCL), inner molecular (IML) and middle/outer molecular (MML/OML) layers of *wild-type* and *Nrxn3*<sup>ΔEx24</sup> mice (N=3 animals per genotype, n=6 brain slices per animal).

(D) Quantification of immunoreactive puncta for Synaptotagmin 2 (SYT2) in dentate gyrus inner molecular layer (IML) of *wild-type* and *Nrxn3*<sup>ΔEx24</sup> mice (N=3 animals per genotype, n=6 brain slices per animal).

(E) Synaptotagmin 2 (SYT2, red) expression in dentate gyrus of *wild-type* and *Nrxn3*<sup>ΔEx24</sup> mice, IML = inner molecular layer, GCL = granule cell layer.

(F) High magnification view of Synaptotagmin 2 (SYT2, red) and detected puncta of SYT2 (green) in dentate gyrus GCL of *wild-type* and *Nrxn3*<sup>ΔEx24</sup> mice.

Mean and SEM, two-way ANOVA followed by Bonferroni's test (C) or student's t-test (D). Scale bar is 50 μm in (A), 10 μm in (B,E, and F).
